# Supplementary material for: Localization of Insertion Sequences in Plasmids for L-Cysteine Production in E. coli
Source: MDPI journal article supplement (doi:10.3390/genes14071317), 2023-06-22
Supplement: s1 [file s1]

# Localization of Insertion Sequences in Plasmids for L-Cysteine Production in *E. coli*

Kevin Heieck and Thomas Brück \*

Chair of Synthetic Biotechnology, School of Natural Sciences, Technical University of  
Munich, Lichtenbergstraße 4, 85748 Garching, Germany; kevin.heieck@tum.de

\* Correspondence: brueck@tum.de; Tel.: +49-89-289-13253

**A**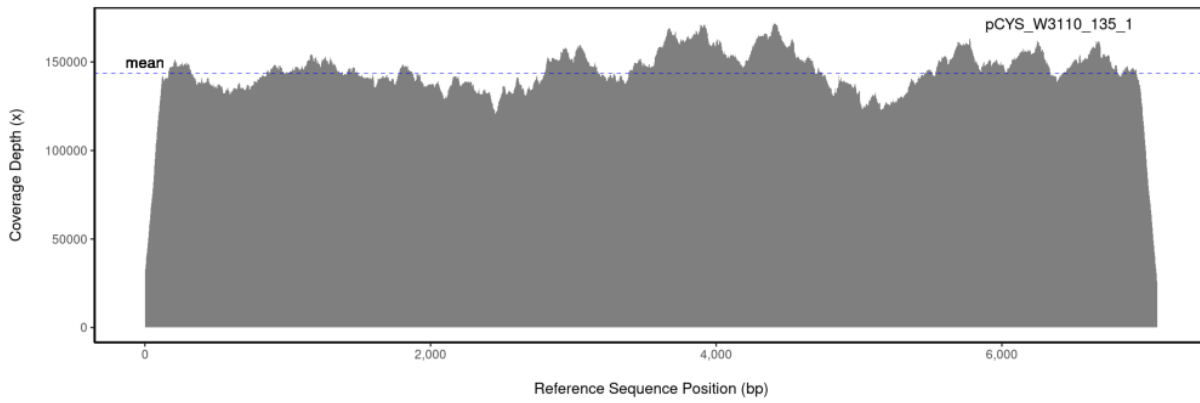**B**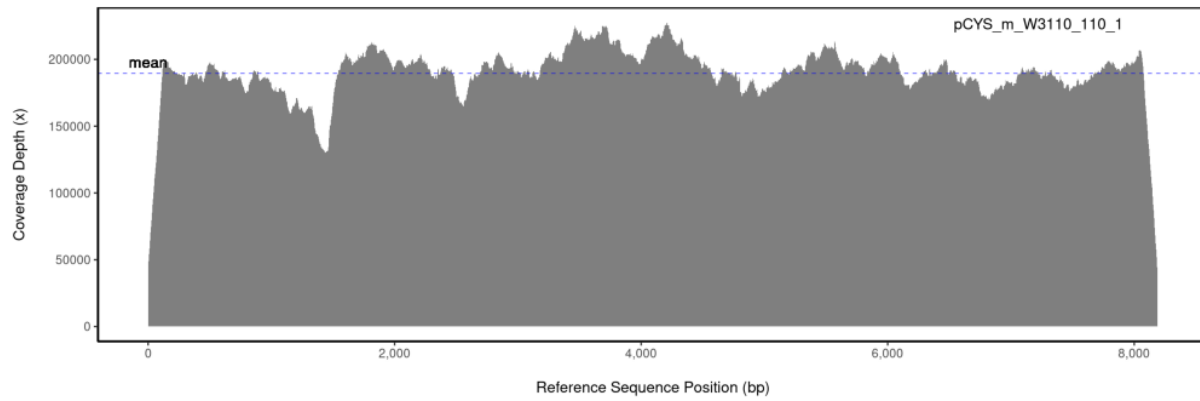**C**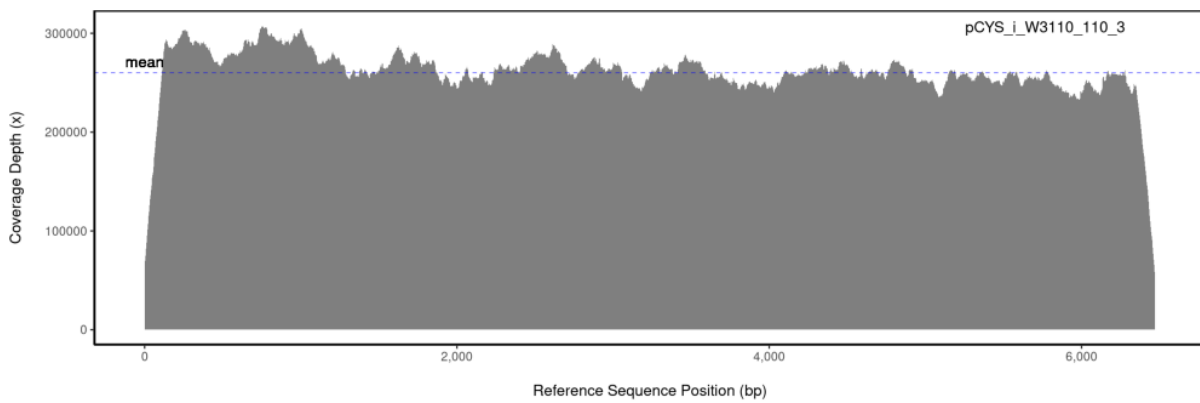

**Supplementary Figure S1: Per base coverage depths (x) of sequenced pCYS (A), pCYS\_i (B) and pCYS\_m (C) extracted from evolved populations (60 cell divisions) of *E. coli* W3110. Sequencing was conducted with Illumina Novaseq paired end 2x150bp.**

| Plasmid                                | pCYS  |      |       |      | pCYS_i |      |       |      | pCYS_m |      |       |      |
|----------------------------------------|-------|------|-------|------|--------|------|-------|------|--------|------|-------|------|
| Strain                                 | W3110 |      | MDS42 |      | W3110  |      | MDS42 |      | W3110  |      | MDS42 |      |
| Population                             | EGP   | LGP  | EGP   | LGP  | EGP    | LGP  | EGP   | LGP  | EGP    | LGP  | EGP   | LGP  |
| Unmapped reads to plasmid sequence [%] | 4.4   | 8.2  | 2.7   | 2.5  | 3.3    | 6    | 2.5   | 2.4  | 3.8    | 7.1  | 2     | 2.1  |
| Reads mapped to IS [%]                 | 0.13  | 0.24 | 0.01  | 0.01 | 0.11   | 0.18 | 0.01  | 0.01 | 0.12   | 0.23 | 0.01  | 0.01 |
| Reads mapped to IS [total]             | 3803  | 5852 | 271   | 249  | 2361   | 5253 | 261   | 245  | 2101   | 6070 | 180   | 196  |

**Supplementary Figure S2: Mapping of sequenced reads against insertion sequence (IS) families [1].:** Table showing the percentages of reads that did not map to the plasmid sequences as well as the percentages of those unmapped reads mapped to IS. Plasmids pCYS, pCYS\_i and pCYS\_m extracted from evolved populations (60 cell divisions) of W3110 got deep sequenced (Methods).

## Reference

1. Heieck, K.; Arnold, N.D.; Bruck, T.B. Metabolic stress constrains microbial L-cysteine production in *Escherichia coli* by accelerating transposition through mobile genetic elements. *Microb. Cell. Fact.* **2023**, *22*, 10. <https://doi.org/10.1186/s12934-023-02021-5>.
